# Supplementary material for: CD1d expression on chronic lymphocytic leukemia B cells affects disease progression and induces T cell skewing in CD8 positive and CD4CD8 double negative T cells
Source: PubMed Central journal article supplement (PMC5226521; doi:10.18632/oncotarget.10372), 2016-07-01
Supplement: oncotarget-07-49459-s001.pdf [file oncotarget-07-49459-s001.pdf]

## CD1d expression on chronic lymphocytic leukemia B cells affects disease progression and induces T cell skewing in CD8 positive and CD4CD8 double negative T cells

### Supplementary Materials

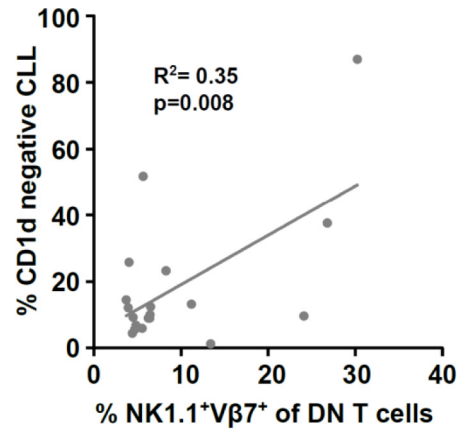

Supplementary Figure S1: Correlation of percentage of CD1d negative CLL cells with occurrence of NK1.1<sup>+</sup>Vβ7<sup>+</sup> cells within DN T cells in TCL1 mice.

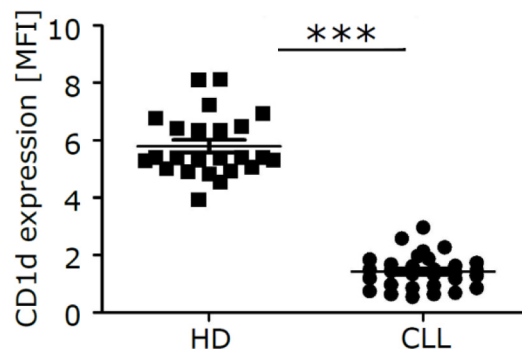

Supplementary Figure S2: CD1d expression on CLL cells. MFI of CD1d on human CLL samples shown in Figure 4C, 4D were calculated.

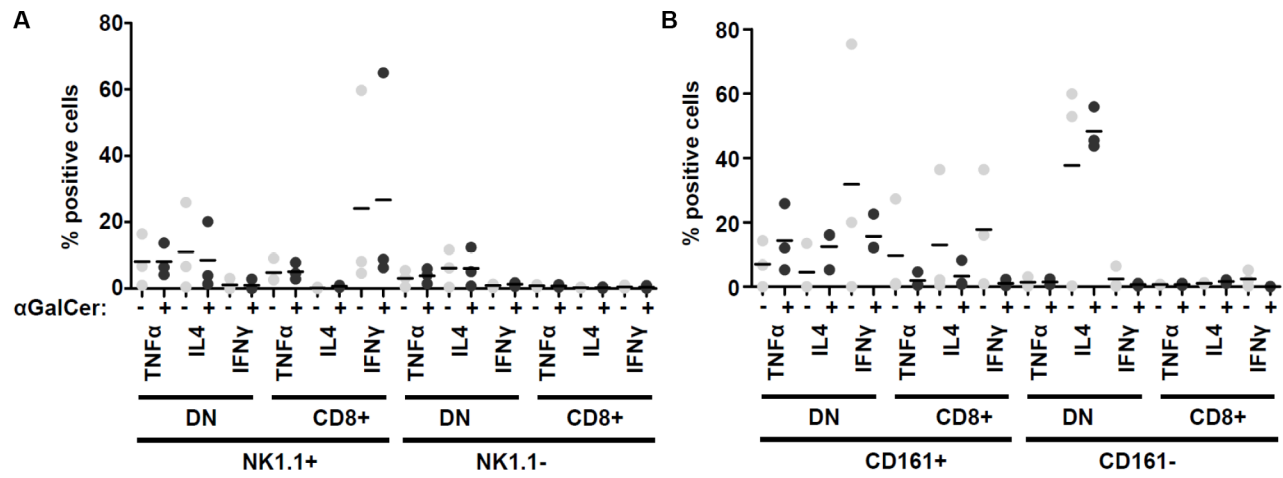

**Supplementary Figure S3: Intracellular cytokine production of CD161 positive and CD161 negative CD8<sup>+</sup> and DN CD3<sup>+</sup> T cells upon  $\alpha$ GalCer treatment *in vitro*.** (A) Spleen cells from sacrificed TCL1 mice were incubated with/without  $\alpha$ GalCer as indicated and the respective cytokines were determined 24 h post incubation. (B) PBMCs from CLL patients were stained for the presence of the respective cytokines 72 h post treatment with/without  $\alpha$ GalCer.

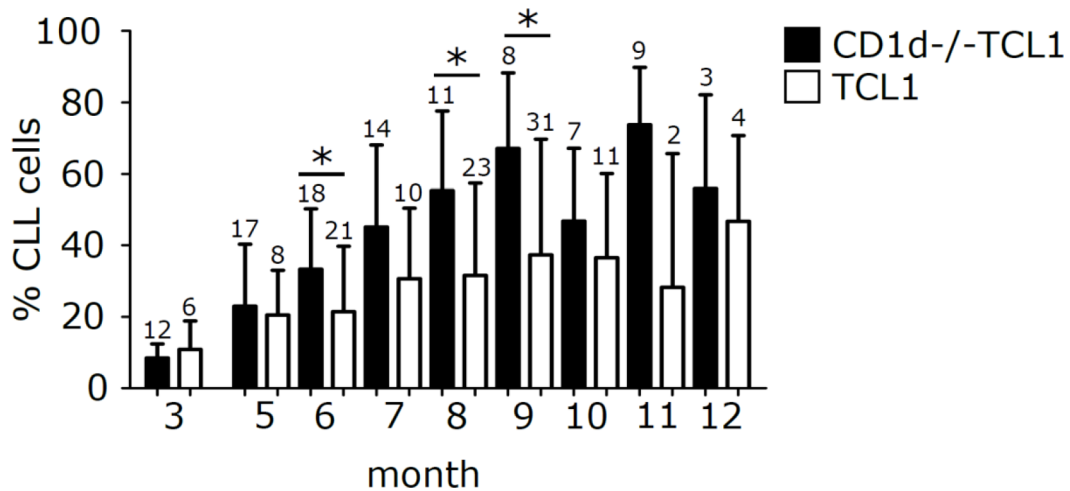

**Supplementary Figure S4: Leukemic cell counts in tail vein blood from TCL1 and CD1d<sup>-/-</sup>TCL1 mice.** Mice were bled at the indicated age and leukemic cells were determined in tail vein blood (% CLL cells of lymphocytes). Significant differences are indicated with an asterisk ( $p = 0.02$ , Mann-Whitney  $t$ -test).

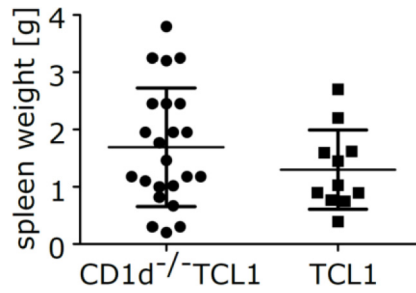

Supplementary Figure S5: Spleen weights of TCL1 and CD1d<sup>-/-</sup>TCL1 mice.

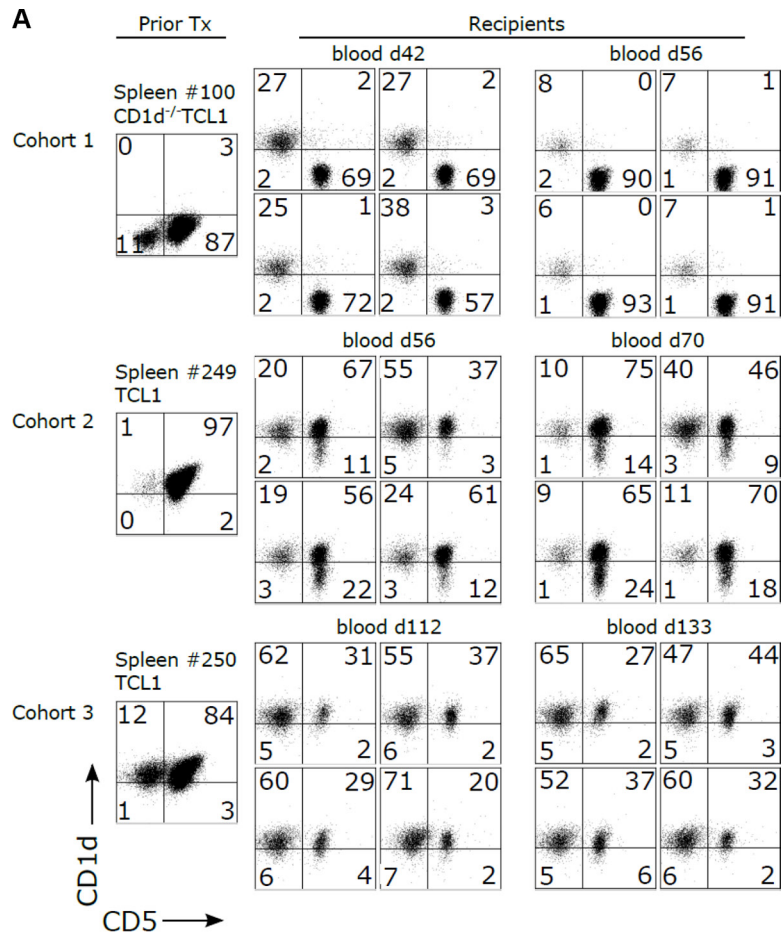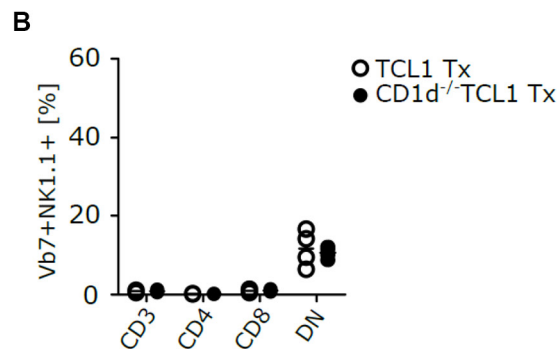

Supplementary Figure S6: CD1d expression and TCR-V $\beta$ 7 skewing upon tumor transplantation. (A) CD1d expression is shown for CD19CD5 positive tumors prior transplantation and for blood samples taken from the four recipients at the indicated time points post transplantation. Numbers within the squares of each FACS plot (gated on CD19<sup>+</sup> lymphocytes) indicate percentages of the respective cell populations. Each FACS plot shows an individual mouse of the respective cohort. (B) Graph showing percentage of the respective spleen CD3<sup>+</sup> T cell subset, which is expressing TCR-V $\beta$ 7 element at humane endpoints (TCL1  $n = 4$ ; CD1d<sup>-/-</sup>TCL1  $n = 4$ ).

**Supplementary Table S1: TCRVb CD161 staining of CLL samples shown in Figure 3**

| CLL# | Sample ID | Patient ID | Rai stage | ZAP 70 | CD38 | VLA-4 CD49d | Sex | Therapy    | Time to diagnosis (ys) | Age at sampling (ys) | Expanded T clone | Expanded CD161+ clone | CMV Serum IgG |
|------|-----------|------------|-----------|--------|------|-------------|-----|------------|------------------------|----------------------|------------------|-----------------------|---------------|
| 1    | 9935      | 777        | I         | high   | high | high        | M   | chemonaive | 1                      | 61                   | yes              | yes                   | +             |
| 2    | 9937      | 122        | 0         | low    | low  | low         | F   | chemonaive | 12                     | 85                   | yes              | yes                   | nd            |
| 3    | 9949      | 565        | 0         | high   | high | low         | M   | treated    | 4                      | 65                   | yes              | yes                   | +             |
| 4    | 9958      | 75         | II        | low    | low  | low         | M   | treated    | 25                     | 62                   | yes              | yes                   | -             |
| 5    | 9959      | 665        | 0         | low    | high | high        | F   | treated    | 6                      | 78                   | yes              | yes                   | +             |
| 6    | 9965      | 782        | 0         | low    | low  | low         | F   | chemonaive | 6                      | 57                   | yes              | yes                   | +             |
| 7    | 9967      | 771        | 0         | nd     | nd   | low         | F   | chemonaive | 0.3                    | 73                   | yes              | yes                   | +             |
| 8    | 9934      | 557        | I         | high   | high | high        | M   | treated    | 4                      | 61                   | yes              | no                    | -             |
| 9    | 9951      | 578        | 0         | low    | low  | low         | F   | treated    | 5                      | 64                   | yes              | no                    | -             |
| 10   | 9953      | 485        | 0         | low    | low  | low         | M   | chemonaive | 13                     | 73                   | no               | no                    | nd            |
| 11   | 9960      | 613        | I         | high   | low  | low         | M   | chemonaive | 5                      | 73                   | no               | no                    | nd            |
| 12   | 9968      | 34         | IV        | nd     | high | nd          | F   | treated    | 11                     | 80                   | no               | no                    | +             |
| 13   | 9932      | 668        | 0         | high   | low  | low         | M   | chemonaive | 3                      | 40                   | no               | no                    | +             |
| 14   | 9936      | 629        | I         | high   | high | high        | M   | treated    | 3                      | 73                   | no               | no                    | -             |
| 15   | 9941      | 534        | II        | high   | low  | low         | M   | treated    | 5                      | 44                   | no               | no                    | -             |
| 16   | 9942      | 778        | I         | high   | high | high        | F   | chemonaive | 1                      | 76                   | no               | no                    | -             |
| 17   | 9950      | 780        | I         | high   | low  | high        | M   | treated    | 3                      | 68                   | no               | no                    | +             |
| 18   | 9952      | 700        | I         | high   | low  | low         | M   | chemonaive | 2                      | 49                   | no               | no                    | -             |

nd: not determined.

ys: years.

**Supplementary Table S2: Patient data for patients shown in Figure 4**

| Sample ID | Patient ID | Leukocyte count | % Lymphocytes | Age at sampling (ys) | Rai stage | ZAP 70     | CD38 | VLA-4 CD49d | Sex | Therapy    | CMV serum IgG | CD1d negative CLL cells [%] |
|-----------|------------|-----------------|---------------|----------------------|-----------|------------|------|-------------|-----|------------|---------------|-----------------------------|
| 7779      | 283        | 10.15           | 61            | 65                   | II        | high       | low  | low         | M   | treated    | –             | 77,1                        |
| 7780      | 442        | 22.86           | 84            | 65                   | 0         | low        | high | low         | M   | chemonaive | nd            | 40,6                        |
| 7783      | 109        | 65.9            | 86            | 86                   | 0–I       | low        | low  | high        | F   | chemonaive | +             | 8,2                         |
| 7784      | 123        | 89.98           | 100           | 73                   | II        | low        | low  | low         | M   | chemonaive | –             | 74,9                        |
| 7786      | 204        | 101.14          | 92            | 72                   | 0–I       | low        | high | high        | M   | chemonaive | –             | 43,4                        |
| 7799      | 496        | 103.9           | 97            | 72                   | 0–I       | low        | low  | low         | M   | chemonaive | –             | 82,1                        |
| 7800      | 230        | 109.81          | 87            | 76                   | 0         | high       | high | high        | F   | chemonaive | +             | 51,8                        |
| 7802      | 531        | 96.52           | 94            | 74                   | I         | high       | low  | low         | M   | chemonaive | –             | 71,2                        |
| 7805      | 337        | 74.06           | 80            | 70                   | I         | low        | high | low         | M   | treated    | +             | 36,2                        |
| 7809      | 400        | 23.6            | 73            | 77                   | 0         | low        | low  | low         | F   | chemonaive | +             | 72,2                        |
| 7811      | 109        | 72.78           | 97            | 86                   | 0–I       | low        | low  | high        | F   | chemonaive | +             | 7                           |
| 7814      | 573        | 16.45           | 68            | 59                   | nd        | low        | low  | n. A.       | F   | chemonaive | –             | 65,6                        |
| 7818      | 262        | 40.87           | 91            | 68                   | I         | low        | low  | low         | M   | chemonaive | –             | 82,3                        |
| 7819      | 223        | 11.89           | 57            | 70                   | 0         | low        | low  | low         | M   | chemonaive | nd            | 64,3                        |
| 7820      | 92         | 26.87           | 79            | 59                   | 0         | low        | low  | low         | M   | chemonaive | +             | 84,7                        |
| 7822      | 13         | 30.74           | 95            | 85                   | 0–I       | low        | low  | low         | M   | chemonaive | +             | 80,7                        |
| 7823      | 435        | 210.5           | 98            | 64                   | II        | low        | low  | low         | F   | chemonaive | –             | 93,8                        |
| 7826      | 13         | 25.84           | 83            | 85                   | 0–I       | low        | low  | low         | M   | chemonaive | +             | 55,5                        |
| 7832      | 175        | 22.16           | 49            | 73                   | 0         | high       | low  | low         | M   | chemonaive | –             | 28,7                        |
| 7833      | 154        | 8.28            | 65            | 78                   | I–II      | low        | low  | low         | M   | treated    | –             | 54,7                        |
| 7839      | 86         | 11.33           | 55            | 52                   | 0         | low        | low  | low         | M   | chemonaive | +             | 23,9                        |
| 7845      | 230        | 103.17          | 94            | 76                   | 0         | high       | high | high        | F   | chemonaive | +             | 85,3                        |
| 7847      | 161        | 21.26           | 62            | 65                   | I         | high       | low  | low         | M   | chemonaive | +             | 84,5                        |
| 7848      | 549        | 19.92           | 74            | 79                   | I–II      | borderline | low  | low         | F   | chemonaive | –             | 63,3                        |
| 7849      | 530        | 85.23           | 94            | 83                   | II        | high       | high | low         | M   | treated    | +             | 88,7                        |
| 7850      | 574        | 43.79           | 78            | 70                   | 0         | borderline | low  | high        | M   | chemonaive | nd            | 40,7                        |
| 7853      | 151        | 69.2            | 85            | 81                   | I         | low        | low  | low         | M   | chemonaive | +             | 89,9                        |
| 7856      | 575        | 33.2            | 78            | 79                   | II        | low        | low  | low         | M   | chemonaive | nd            | 94,4                        |
| 7858      | 93         | 12.5            | 61            | 79                   | 0         | low        | low  | low         | F   | chemonaive | +             | 77,9                        |
| 7859      | 153        | 10.05           | 53            | 87                   | I         | high       | high | high        | M   | treated    | borderline    | 73,4                        |

nd: not determined.

ys: years.

Leukocyte count:  $\times 1000/\mu\text{l}$  blood.

% Lymphocytes: % lymphocytes of leukocytes.

**Supplementary Table S3: The CD1d neg**

| risk factor           | N (risk group)                                                       | P-Value |
|-----------------------|----------------------------------------------------------------------|---------|
| leukocyte count       | 30                                                                   | 0.312   |
| lymphocyte percentage | 30                                                                   | 0.230   |
| age                   | 30                                                                   | 0.707   |
| ZAP-70                | 17 (low)<br>11 (high)                                                | 0.069   |
| CD38                  | 23 (low)<br>7 (high)                                                 | 0.693   |
| VLA4 CD49d            | 22 (low)<br>7 (high)                                                 | 0.020 * |
| Sex                   | 21 (male)<br>9 (female)                                              | 0.489   |
| Treatment status      | 25 (untreated)<br>5 (treated)                                        | 0.788   |
| CMV serum IgG         | 11 (neg)<br>14 (pos)                                                 | 0.537   |
| RAI stage             | 10 (Rai 0)<br>6 (Rai 0-I)<br>6 (Rai I)<br>2 (Rai I-II)<br>5 (Rai II) | 0.029 * |

Data set was tested for normal distribution by the Kolmogorov-Smirnov normality test and the D'Agostino & Pearson omnibus normality test. Correlation analysis to leukocyte count, lymphocyte percentage and age were performed using Pearson correlation. Relation of CD1d negative CLL cells to ZAP-70, CD38, VLA4 subunit CD49d, Sex and CMV serum IgG groups were analysed by an unpaired *T*-test. Association to RAI stages was determined by ANNOVA analysis. *P*-Values < 0.05 were considered as significant.

**Supplementary Table S4: NKT cell staining of CD1+/+(wildtype), TCL1, CD1d-/- and CD1d-/- TCL1 mice (from Figure 2D and 5D)****A**

|                     | CD3+        | CD3+CD4+    | CD3+CD8+    | CD3+DN        |
|---------------------|-------------|-------------|-------------|---------------|
| CD1d+/+ (n = 6)     | 0.5% ± 0.2% | 0.2% ± 0.2% | 0.5% ± 0.2% | 3.5% ± 3.1%   |
| CD1d-/- (n = 4)     | 0.3% ± 0.2% | 0.0% ± 0.0% | 0.4% ± 0.2% | 4.8% ± 1.5%   |
| CD1d+/+TCL1 (n = 6) | 4.8% ± 3.4% | 0.9% ± 1.0% | 6.6% ± 5.3% | 29.0% ± 14.8% |
| CD1d-/-TCL1 (n = 5) | 1.2% ± 0.7% | 0.1% ± 0.2% | 2.5% ± 1.8% | 10.8% ± 5.8%  |

Percentage of NKT cell (CD3+, NK1.1+, TCR Vb7+) subsets (CD4+, CD8+ or DN) within different mouse cohorts. (mean % ± standard deviation).

**B**

|                            | CD3+             | CD3+CD4+         | CD3+CD8+         | CD3+DN           |
|----------------------------|------------------|------------------|------------------|------------------|
| CD1d+/+TCL1 vs CD1d+/+     | <i>p</i> = 0.005 | <i>p</i> = 0.084 | <i>p</i> = 0.005 | <i>p</i> = 0.002 |
| CD1d+/+TCL1 vs CD1d-/-     | <i>p</i> = 0.01  | <i>p</i> = nd    | <i>p</i> = 0.01  | <i>p</i> = 0.01  |
| CD1d-/-TCL1 vs CD1d+/+     | <i>p</i> = 0.034 | <i>p</i> = 0.27  | <i>p</i> = 0.013 | <i>p</i> = 0.03  |
| CD1d-/-TCL1 vs CD1d-/-     | <i>p</i> = 0.05  | <i>p</i> = nd    | <i>p</i> = 0.02  | <i>p</i> = 0.11  |
| CD1d-/-TCL1 vs CD1d+/+TCL1 | <i>p</i> = 0.028 | <i>p</i> = 0.064 | <i>p</i> = 0.142 | <i>p</i> = 0.017 |

*p*-values of data from (A) as determined by Mann-Whitney test.

(nd: not definable as all splenocytes from CD1d-/- mice have 0% NKT cells within CD3+CD4+ cells).
